# Supplementary material for: Identification of Pummelo Cultivars by Using a Panel of 25 Selected SNPs and 12 DNA Segments
Source: PLoS One. 2014 Apr 14;9(4):e94506. doi: 10.1371/journal.pone.0094506 (PMC3986212; doi:10.1371/journal.pone.0094506)
Supplement: Table S1 — 178 genotypes of the 260 accessions on the 25 Set1 SNPs. Note: Red and blue background indicate the UNKNOWN group and the CUL group, respectively. (XLSX) [file pone.0094506.s004.xlsx]

## Sheet: Sheet1
Table S1. 178 genotypes of the 260 accesions on the 25 SNPs.
ID	Genotype_name	Group	Sampling location	Cultivar origin	Heterozygous loci	chr1_7539019A/G	chr1_20043485A/G	chr1_25991020A/T	chr2_31491T/C	chr2_16534248A/G	chr2_30594899T/C	chr2_30595627T/C	chr3_10462341T/C	chr3_25525170A/G	chr4_4533744A/G	chr4_14833122T/C	chr5_2097500T/G	chr5_12963514T/C	chr5_13684450T/C	chr5_15275826A/G	chr6_16520557A/G	chr7_7194644A/G	chr7_7195033T/G	chr7_22205388T/C	chr7_31599886T/G	chr9_2379630T/G	chr9_13716551T/C	chr9_15596085A/G	chrUn_5023005A/G	chrUn_19904498A/G
1	mdy1	MYANMAR	N23°52.275′E97°41.285′	-	11	T,C	C,C	T,A	T,C	A,G	T,T	A,G	T,T	T,C	C,C	A,A	G,T	G,T	T,C	C,C	T,T	T,C	A,A	T,T	C,C	G,T	C,C	A,A	A,A	A,G
2	mdy2	MYANMAR	N23°52.275′E97°41.285′	-	5	C,C	C,C	T,T	T,T	A,A	C,C	A,A	C,C	T,T	C,C	A,A	G,T	T,T	C,C	T,T	T,C	C,C	A,A	T,T	C,C	G,T	C,C	A,G	A,G	A,A
3	mdy3	MYANMAR	N23°52.275′E97°41.285′	-	6	T,C	C,C	T,T	T,T	A,A	C,C	A,A	C,C	T,T	C,C	A,A	G,G	G,T	C,C	T,T	T,C	C,C	A,A	T,T	C,C	G,T	C,C	G,G	A,G	A,G
4	mdy4	MYANMAR	N23°52.275′E97°41.285′	-	11	T,C	C,C	T,T	T,T	A,G	T,C	A,A	T,C	T,T	C,C	A,A	G,G	G,T	T,C	T,T	T,C	T,C	A,A	T,T	C,C	G,G	C,C	A,G	A,G	A,G
5	mdy5	MYANMAR	N23°52.275′E97°41.285′	-	11	T,C	C,C	T,T	T,C	A,A	T,C	A,G	C,C	T,C	T,C	A,A	G,G	G,T	C,C	T,C	C,C	C,C	A,A	T,T	C,C	G,T	C,C	A,G	A,G	G,G
6	mdy6	MYANMAR	N23°52.275′E97°41.285′	-	3	T,T	C,C	T,T	T,T	A,A	C,C	A,A	C,C	T,T	C,C	A,A	G,T	T,T	C,C	T,C	C,C	C,C	A,A	T,C	C,C	T,T	C,C	G,G	A,A	A,A
7	mdy7	MYANMAR	N23°52.275′E97°41.285′	-	5	T,T	T,C	T,T	T,C	A,A	C,C	A,A	C,C	T,T	C,C	A,A	T,T	T,T	C,C	T,T	C,C	C,C	A,A	T,T	C,C	G,T	C,C	G,G	A,G	A,G
8	mdy8	MYANMAR	N23°52.275′E97°41.285′	-	6	T,T	C,C	T,T	T,T	A,A	C,C	A,A	C,C	T,T	C,C	A,A	G,T	T,T	C,C	T,T	T,C	T,C	A,A	T,T	C,C	G,G	C,C	A,G	A,G	A,G
9	mdy9	MYANMAR	N23°52.275′E97°41.285′	-	11	T,T	C,C	T,T	T,C	A,A	T,C	A,G	T,C	T,T	T,T	A,A	G,T	G,T	T,C	T,C	T,T	C,C	A,A	T,C	C,C	T,T	C,C	A,G	A,A	A,G
10	mdy10	MYANMAR	N23°52.275′E97°41.285′	-	7	T,T	C,C	T,T	T,C	A,G	T,C	A,A	C,C	T,T	T,C	A,A	G,G	T,T	C,C	T,T	T,C	C,C	A,A	T,C	C,C	T,T	C,C	G,G	A,A	A,G
11	mdy11	MYANMAR	N23°52.275′E97°41.285′	-	6	T,C	T,C	T,A	T,T	A,A	C,C	A,A	C,C	T,T	C,C	A,A	G,T	T,T	T,C	T,C	C,C	C,C	A,A	T,T	C,C	T,T	C,C	A,G	G,G	A,A
12	mdy12	MYANMAR	N23°52.275′E97°41.285′	-	7	T,C	C,C	T,A	T,T	A,A	T,C	A,A	C,C	T,T	C,C	A,A	G,T	G,T	T,C	T,C	C,C	C,C	A,A	T,T	C,C	G,G	C,C	G,G	A,A	A,G
13	mdy13	MYANMAR	N23°52.275′E97°41.285′	-	5	T,C	C,C	T,T	T,T	A,G	C,C	A,A	T,C	T,C	C,C	A,A	T,T	T,T	C,C	T,T	T,T	C,C	A,A	T,T	C,C	G,G	C,C	G,G	A,G	A,A
14	mdy14	MYANMAR	N23°52.275′E97°41.285′	-	8	T,C	C,C	T,T	T,C	A,A	C,C	A,G	C,C	T,T	T,C	A,A	G,T	G,T	C,C	T,T	C,C	C,C	A,A	T,T	C,C	T,T	C,C	G,G	A,G	A,G
15	mdy15	MYANMAR	N23°52.275′E97°41.285′	-	3	T,C	C,C	T,T	T,T	A,G	C,C	A,A	C,C	T,T	C,C	A,A	T,T	T,T	C,C	T,T	C,C	C,C	A,A	T,T	C,C	G,G	C,C	G,G	A,A	A,G
16	mdy16	MYANMAR	N23°52.275′E97°41.285′	-	4	T,T	C,C	T,T	C,C	A,A	T,C	A,G	C,C	T,T	T,C	A,A	G,G	T,T	C,C	T,T	C,C	C,C	A,A	T,C	C,C	G,G	C,C	G,G	A,A	G,G
17	mdy17	MYANMAR	N23°52.275′E97°41.285′	-	10	T,C	C,C	T,T	T,C	A,A	T,C	A,G	T,C	T,T	T,C	A,A	G,T	G,T	T,C	C,C	T,T	C,C	A,A	T,T	C,C	G,T	C,C	G,G	A,A	A,A
18	mdy18	MYANMAR	N23°52.275′E97°41.285′	-	10	T,T	C,C	T,A	T,T	A,G	C,C	A,A	C,C	T,T	T,C	A,A	G,T	G,T	T,C	T,C	T,C	C,C	A,A	T,T	C,C	G,T	C,C	G,G	A,G	A,G
19	mdy19	MYANMAR	N23°52.275′E97°41.285′	-	9	T,C	C,C	T,T	T,C	A,A	T,C	A,G	T,T	T,T	C,C	A,A	G,T	G,T	T,C	T,C	C,C	C,C	A,A	T,C	C,C	G,G	C,C	G,G	A,A	A,A
20	mdy20	MYANMAR	N24°3.173′E97°35.349′	-	8	T,T	T,C	T,A	T,T	A,G	T,C	A,A	C,C	T,T	T,C	A,A	G,T	T,T	C,C	T,T	T,T	C,C	A,A	T,C	C,C	G,T	C,C	A,G	G,G	A,A
21	mdy21	MYANMAR	N24°3.173′E97°35.349′	-	11	T,C	T,C	T,T	T,T	A,A	C,C	A,A	C,C	T,C	T,C	A,A	G,T	T,T	C,C	T,C	T,C	C,C	A,A	T,C	C,C	T,T	C,C	A,G	A,G	A,G
22	mdy22	MYANMAR	N24°3.173′E97°35.349′	-	8	T,C	C,C	T,T	T,T	A,G	C,C	A,A	T,C	T,T	T,C	A,A	G,T	T,T	C,C	T,C	T,T	C,C	A,A	T,T	C,C	G,G	C,C	A,G	A,A	A,G
23	mdy23	MYANMAR	N24°3.173′E97°35.349′	-	7	C,C	C,C	T,A	T,T	A,G	T,C	A,A	C,C	T,T	C,C	A,A	G,T	G,T	T,C	T,C	T,T	C,C	A,A	T,T	C,C	G,G	C,C	A,G	G,G	A,A
24	mdy24	MYANMAR	N24°3.173′E97°35.349′	-	9	T,C	T,C	T,A	T,T	A,G	T,C	A,A	C,C	T,T	T,C	A,A	G,T	T,T	C,C	T,C	T,C	C,C	A,A	C,C	C,C	G,G	C,C	A,G	G,G	A,A
25	mdy25	MYANMAR	N24°3.173′E97°35.349′	-	13	T,C	C,C	T,T	T,C	A,G	T,C	A,G	T,C	T,T	T,C	A,A	G,T	G,T	T,C	T,C	T,C	C,C	A,A	C,C	C,C	T,T	C,C	G,G	G,G	A,G
26	mdy26	MYANMAR	N24°3.173′E97°35.349′	-	7	T,C	T,C	T,T	T,C	A,G	C,C	A,A	C,C	T,T	C,C	A,A	G,T	T,T	C,C	T,T	C,C	C,C	A,A	T,T	C,C	T,T	C,C	A,G	A,A	A,G
27	mdy27	MYANMAR	N24°3.173′E97°35.349′	-	8	T,T	C,C	T,T	T,T	A,G	T,T	A,A	C,C	T,C	T,T	A,A	G,T	G,T	T,C	C,C	T,T	C,C	A,A	T,C	C,C	T,T	C,C	A,G	A,G	A,A
28	mdy28	MYANMAR	N24°3.173′E97°35.349′	-	9	T,T	T,C	T,T	T,C	A,G	T,C	A,A	C,C	T,C	T,C	A,A	G,G	T,T	C,C	T,C	C,C	C,C	A,A	C,C	C,C	T,T	C,C	A,G	A,G	A,A
29	mdy29	MYANMAR	N24°3.173′E97°35.349′	-	7	T,C	C,C	T,T	T,C	A,G	T,C	A,A	T,C	T,T	C,C	A,A	G,T	T,T	C,C	T,T	C,C	C,C	A,A	C,C	C,C	G,G	C,C	A,G	G,G	A,A
30	mdy30	MYANMAR	N24°3.173′E97°35.349′	-	5	C,C	T,C	T,T	T,T	A,A	C,C	A,A	C,C	T,C	C,C	A,A	T,T	T,T	C,C	T,C	T,T	C,C	A,A	T,C	C,C	T,T	C,C	A,G	G,G	A,A
31	mdy31	MYANMAR	N24°3.173′E97°35.349′	-	4	C,C	C,C	T,A	T,C	A,G	C,C	A,A	C,C	T,T	C,C	A,A	G,T	T,T	C,C	T,T	T,T	C,C	A,A	T,C	C,C	G,G	C,C	G,G	G,G	A,A
32	mdy32	MYANMAR	N24°3.173′E97°35.349′	-	6	T,T	C,C	T,T	T,C	A,A	C,C	A,A	C,C	T,T	T,C	A,A	G,T	G,T	C,C	T,T	C,C	C,C	A,A	T,T	C,C	G,G	C,C	A,G	A,G	G,G
33	mdy33	MYANMAR	N24°3.173′E97°35.349′	-	9	T,C	T,C	T,T	T,T	A,A	C,C	A,A	C,C	T,T	C,C	A,A	G,T	G,T	T,C	C,C	C,C	C,C	A,A	T,C	C,C	T,T	C,C	A,G	A,G	A,G
34	mdy34	MYANMAR	N24°3.173′E97°35.349′	-	6	T,C	C,C	T,T	C,C	G,G	T,T	A,A	C,C	T,T	C,C	A,A	T,T	G,T	T,C	T,C	T,T	C,C	A,A	T,C	C,C	G,G	C,C	A,G	G,G	A,A
35	mdy35	MYANMAR	N24°3.173′E97°35.349′	-	5	T,T	T,C	T,A	C,C	A,A	C,C	A,A	C,C	T,T	T,C	A,A	G,T	T,T	C,C	T,T	T,C	C,C	A,A	T,T	C,C	G,G	C,C	G,G	A,A	A,G
36	mdy36	MYANMAR	N24°3.173′E97°35.349′	-	10	T,C	C,C	T,T	T,T	A,A	T,C	A,A	C,C	T,T	T,C	A,A	G,T	G,T	T,C	T,C	T,C	C,C	A,A	T,T	C,C	T,T	C,C	A,G	A,A	A,G
37	mdy37	MYANMAR	N24°3.173′E97°35.349′	-	7	T,T	T,C	T,T	T,T	A,G	T,C	A,A	T,T	T,T	C,C	A,A	G,T	T,T	C,C	T,T	T,C	C,C	A,A	T,C	C,C	T,T	C,C	G,G	A,G	A,A
38	mdy38	MYANMAR	N24°3.173′E97°35.349′	-	14	T,C	T,C	T,A	T,C	A,G	T,C	A,G	C,C	T,T	C,C	A,A	G,T	G,T	T,C	T,C	T,C	C,C	A,A	T,C	C,C	T,T	C,C	G,G	A,G	A,G
39	mdy39	MYANMAR	N24°3.173′E97°35.349′	-	7	T,C	C,C	T,T	C,C	A,A	T,T	A,G	C,C	T,T	C,C	A,A	T,T	T,T	C,C	T,T	T,C	C,C	A,A	T,T	C,C	G,T	C,C	A,G	A,G	A,G
40	mdy40	MYANMAR	N24°3.173′E97°35.349′	-	4	T,T	C,C	T,T	T,T	A,G	C,C	A,A	C,C	T,T	C,C	A,A	T,T	T,T	C,C	T,T	T,T	C,C	A,A	T,T	C,C	G,T	C,C	G,G	A,G	A,G
41	mdy41	MYANMAR	N24°3.173′E97°35.349′	-	6	T,T	T,C	T,A	T,C	G,G	C,C	A,A	T,C	T,T	C,C	A,A	G,G	T,T	C,C	T,T	C,C	C,C	A,A	T,C	C,C	G,T	C,C	G,G	G,G	A,G
42	mdy42	MYANMAR	N24°3.173′E97°35.349′	-	6	T,C	C,C	T,T	T,C	A,G	C,C	A,A	C,C	T,T	T,C	A,A	G,G	T,T	C,C	T,T	T,C	C,C	A,A	T,T	C,C	G,T	C,C	G,G	G,G	A,A
43	mdy43	MYANMAR	N24°3.173′E97°35.349′	-	11	T,C	C,C	T,T	T,C	A,A	T,C	A,G	T,C	T,T	C,C	A,A	G,T	T,T	C,C	T,T	T,C	C,C	A,A	T,C	C,C	G,T	C,C	A,G	A,A	A,G
44	mdy44	MYANMAR	N24°3.173′E97°35.349′	-	4	C,C	C,C	T,T	T,C	A,A	C,C	A,A	C,C	T,T	C,C	A,A	G,T	G,G	T,T	C,C	T,T	C,C	A,A	T,T	C,C	G,G	C,C	A,G	A,G	A,A
45	mdy45	MYANMAR	N24°3.173′E97°35.349′	-	4	C,C	C,C	T,A	T,C	A,A	C,C	A,A	C,C	T,T	T,C	A,A	G,G	T,T	C,C	C,C	T,C	C,C	A,A	T,C	C,C	G,G	C,C	G,G	G,G	A,A
46	mdy46	MYANMAR	N24°3.173′E97°35.349′	-	9	T,C	C,C	T,T	T,T	A,A	T,C	A,A	T,C	T,T	T,C	A,A	G,T	T,T	C,C	T,T	T,T	C,C	A,A	T,T	C,C	G,T	C,C	A,G	A,G	A,G
47	mdy47	MYANMAR	N24°3.173′E97°35.349′	-	7	T,T	C,C	T,T	T,C	A,A	C,C	A,A	C,C	T,T	C,C	A,A	G,G	G,T	T,C	T,C	T,C	C,C	A,A	T,T	C,C	T,T	C,C	A,G	A,G	A,A
48	mdy48	MYANMAR	N24°3.173′E97°35.349′	-	10	T,C	T,C	T,T	T,T	A,A	C,C	G,G	T,C	T,T	T,T	A,A	G,T	G,T	T,C	T,C	T,T	C,C	A,A	T,C	C,C	T,T	C,C	A,G	G,G	A,G
49	mdy49	MYANMAR	N24°3.173′E97°35.349′	-	7	T,C	C,C	T,T	T,C	A,A	T,C	A,A	C,C	T,T	C,C	A,A	G,T	T,T	C,C	C,C	T,T	C,C	A,A	T,C	C,C	G,T	C,C	G,G	A,G	A,A
50	mdy50	MYANMAR	N24°3.173′E97°35.349′	-	14	T,C	C,C	T,A	T,C	A,A	T,C	A,G	T,C	T,T	T,C	A,A	G,G	G,T	T,C	T,C	T,C	C,C	A,A	T,C	C,C	G,T	C,C	A,G	A,G	A,A
51	mdy51	MYANMAR	N24°3.173′E97°35.349′	-	8	C,C	T,C	T,T	T,T	A,A	C,C	A,G	T,C	T,T	T,C	A,A	G,G	G,T	T,C	T,C	T,T	C,C	A,A	T,T	C,C	T,T	C,C	G,G	G,G	A,G
52	mdy52	MYANMAR	N24°3.173′E97°35.349′	-	9	T,C	C,C	T,T	T,T	A,A	T,C	A,A	T,C	T,T	T,C	A,A	G,G	G,T	T,C	T,C	C,C	C,C	A,A	T,T	C,C	G,T	C,C	A,G	G,G	A,A
53	mdy53	MYANMAR	N24°3.173′E97°35.349′	-	3	T,T	C,C	T,A	T,C	A,A	C,C	A,A	C,C	T,C	C,C	A,A	T,T	T,T	C,C	T,T	T,T	C,C	A,A	T,T	C,C	G,G	C,C	A,G	A,A	A,A
54	mdy54	MYANMAR	N24°3.173′E97°35.349′	-	8	T,T	T,T	T,T	T,T	A,A	T,C	A,A	C,C	T,T	T,C	A,A	G,G	G,T	T,C	T,C	T,T	C,C	A,A	T,C	C,C	T,T	C,C	A,G	G,G	A,G
55	mdy55	MYANMAR	N24°3.173′E97°35.349′	-	7	T,C	T,T	T,T	T,C	A,A	T,T	A,A	T,C	T,T	T,C	A,A	G,G	T,T	C,C	T,T	T,T	C,C	A,A	T,T	C,C	G,G	C,C	A,G	A,G	A,G
56	Unknown_1	UNASSIGNED	Chongqing	-	4	T,T	C,C	T,T	T,C	A,A	C,C	A,A	C,C	T,T	T,C	A,A	G,T	T,T	C,C	T,T	T,C	C,C	A,A	T,T	C,C	T,T	C,C	G,G	A,A	A,A
57	Unknown_2	UNASSIGNED	Chongqing	-	5	T,C	C,C	T,T	T,T	G,G	C,C	A,A	T,C	T,T	C,C	A,A	T,T	T,T	C,C	T,C	T,T	C,C	A,A	T,T	C,C	T,T	C,C	G,G	A,G	A,G
58	Unknown_24-14	UNASSIGNED	Chongqing	-	8	T,T	C,C	T,A	T,C	A,G	C,C	A,G	C,C	T,T	C,C	A,A	T,T	G,T	T,C	T,C	T,C	C,C	A,A	T,T	C,C	T,T	T,C	G,G	G,G	A,A
59	Unknown_29-12/Unknown_14-13	UNASSIGNED	Chongqing	-	13	T,C	T,C	T,T	T,C	A,G	T,C	A,G	T,C	T,T	T,C	A,A	G,G	T,T	C,C	T,T	T,C	C,C	C,A	T,T	C,C	G,T	T,C	G,G	A,G	A,A
60	Unknown_3	UNASSIGNED	Guangzhou	-	5	T,T	C,C	T,A	T,T	A,G	C,C	A,A	C,C	C,C	T,T	A,A	G,G	G,G	T,T	C,C	T,T	C,C	A,A	T,T	C,C	G,T	C,C	A,G	A,G	A,G
61	Unknown_4	UNASSIGNED	Chongqing	-	7	T,T	T,C	T,T	C,C	G,G	C,C	A,A	T,C	T,T	C,C	A,A	T,T	T,T	C,C	T,C	T,T	T,C	A,A	T,T	C,C	G,T	C,C	A,G	A,G	A,A
62	Unknown_5	UNASSIGNED	Chongqing	-	7	T,C	T,C	T,T	T,C	A,A	C,C	A,A	C,C	T,T	T,C	A,A	G,G	T,T	C,C	T,T	C,C	C,C	A,A	T,T	C,C	G,T	C,C	A,A	A,G	A,G
63	Unknown_6	UNASSIGNED	Chongqing	-	8	T,T	C,C	T,A	T,T	A,G	C,C	A,G	T,T	T,T	C,C	A,A	G,T	T,T	C,C	T,C	T,C	T,C	C,A	T,T	C,C	G,G	T,C	G,G	G,G	A,A
64	Unknown_7	UNASSIGNED	Chongqing	-	3	T,T	C,C	T,A	T,T	A,A	T,C	A,A	C,C	T,T	C,C	A,A	T,T	T,T	C,C	T,C	T,T	C,C	A,A	T,T	C,C	T,T	C,C	G,G	G,G	A,G
65	Unknown_8	UNASSIGNED	Chongqing	-	4	C,C	C,C	T,T	T,C	A,A	C,C	A,A	C,C	T,C	T,C	A,A	T,T	T,T	C,C	T,T	C,C	C,C	A,A	T,T	C,C	T,T	C,C	G,G	A,A	A,G
66	Unknown_80-20	UNASSIGNED	Chongqing	-	4	T,T	C,C	T,A	T,T	A,G	T,C	A,A	T,T	T,T	T,C	A,A	T,T	G,T	C,C	T,T	C,C	C,C	A,A	T,T	C,C	G,G	C,C	A,A	G,G	G,G
67	Unknown_80-26	UNASSIGNED	Chongqing	-	5	C,C	C,C	T,T	T,T	A,A	C,C	A,A	T,C	T,T	T,C	A,A	G,G	G,T	C,C	T,T	C,C	C,C	A,A	T,T	C,C	T,T	C,C	A,G	A,G	A,A
68	Unknown_80-88	UNASSIGNED	Chongqing	-	8	T,T	C,C	T,A	C,C	G,G	C,C	A,G	T,C	T,T	T,C	A,G	T,T	G,T	C,C	T,C	T,C	C,C	A,A	T,T	C,C	T,T	C,C	A,G	G,G	A,A
69	Unknown_pummelo_hybrid	UNASSIGNED	Chongqing	-	4	T,T	C,C	T,A	T,T	A,G	C,C	A,A	C,C	T,T	T,T	A,G	T,T	G,G	C,C	T,T	C,C	C,C	C,A	T,T	C,C	G,G	C,C	A,G	G,G	A,A
70	Unknown_y69	UNASSIGNED	Guangzhou	-	8	T,T	T,C	T,A	T,T	G,G	T,C	G,G	C,C	T,T	T,C	A,G	G,G	T,T	C,C	T,C	C,C	C,C	A,A	T,T	C,A	T,T	T,C	G,G	G,G	A,G
71	Aiyou	UNASSIGNED	Chongqing	-	13	T,C	T,C	T,T	T,C	A,G	T,C	A,G	C,C	T,C	T,C	A,A	T,T	T,T	C,C	T,T	T,C	T,C	A,A	T,T	C,C	G,G	T,C	A,G	G,G	A,G
72	Anjianghongxinyou2	UNASSIGNED	Chongqing, Guangzhou	Hunan	9	T,T	C,C	T,A	T,C	A,G	T,C	A,A	T,C	T,T	C,C	A,A	G,T	T,T	C,C	T,C	C,C	C,C	A,A	C,C	C,C	T,T	C,C	A,G	A,G	A,G
73	Anjiangshiliuyou2	UNASSIGNED	Chongqing	Hunan	9	T,T	C,C	T,T	C,C	A,G	T,C	A,A	T,T	T,T	T,C	A,G	T,T	G,T	C,C	T,C	T,C	C,C	A,A	T,T	C,C	T,T	C,C	G,G	A,G	A,G
74	Anjiangwuheyou2/Annongyihaoxiangyou	UNASSIGNED	Chongqing, Guangzhou	Hunan	8	T,T	C,C	T,T	T,C	A,G	T,C	A,G	T,T	T,T	T,C	A,A	T,T	G,T	C,C	T,T	T,C	C,C	A,A	T,C	C,C	G,G	C,C	G,G	A,A	A,A
75	Cubapummelo2	UNASSIGNED	Chongqing, Guangzhou	-	10	T,C	C,C	T,A	C,C	A,A	T,C	G,G	C,C	T,T	T,C	A,A	G,T	T,T	C,C	T,C	T,C	T,C	C,A	T,T	C,C	G,G	C,C	G,G	A,G	A,G
76	Cuiyou2_cq	UNASSIGNED	Chongqing	Chongqing	5	T,T	T,C	T,A	T,T	A,G	C,C	A,A	C,C	T,T	T,C	A,A	T,T	T,T	C,C	C,C	C,C	C,C	C,A	T,T	C,C	T,T	C,C	G,G	A,G	A,A
77	Cuiyou2_gz	UNASSIGNED	Guangzhou	Chongqing	6	T,T	T,C	T,T	T,T	G,G	C,C	A,A	C,C	T,T	T,T	A,A	G,T	G,T	C,C	T,T	C,C	T,C	A,A	T,T	C,C	G,G	C,C	A,G	A,G	A,A
78	Dianjiang*jiahongxinyou	UNASSIGNED	Chongqing	Chongqing	4	T,C	T,T	T,T	T,C	A,A	C,C	A,A	C,C	T,T	T,C	A,A	G,G	T,T	C,C	T,T	T,C	C,C	A,A	C,C	C,C	T,T	C,C	G,G	G,G	A,A
79	Dianjianghongxinyou2	UNASSIGNED	Chongqing, , Guangzhou	Chongqing	2	C,C	C,C	A,A	T,T	A,G	C,C	A,A	T,C	T,T	C,C	A,A	T,T	G,G	C,C	T,T	C,C	C,C	A,A	T,T	C,C	T,T	C,C	G,G	G,G	A,A
80	Dongfengzao	UNASSIGNED	Chongqing	-	6	T,C	C,C	T,A	T,C	A,A	C,C	A,A	C,C	C,C	T,T	A,A	G,T	T,T	C,C	T,C	T,T	C,C	C,A	T,T	C,C	G,T	C,C	G,G	A,A	G,G
81	Early Zhenlongyou	UNASSIGNED	Chongqing	Chongqing	9	T,C	T,C	T,T	T,T	A,A	C,C	G,G	T,T	T,T	T,C	A,A	G,T	T,T	C,C	T,C	T,C	T,C	C,A	T,T	C,C	G,T	C,C	G,G	G,G	A,A
82	Fengjie75-1	UNASSIGNED	Chongqing	Chongqing	4	T,C	C,C	T,A	T,T	A,A	T,T	G,G	C,C	T,T	C,C	A,A	T,T	T,T	C,C	T,T	T,C	T,C	C,A	T,T	C,C	G,G	C,C	G,G	G,G	A,A
83	Gaopoyou/Bianboyou	UNASSIGNED	Chongqing, Guangzhou	-	6	T,T	T,C	T,A	T,T	A,G	C,C	A,A	C,C	T,T	C,C	A,A	G,T	G,T	C,C	T,T	C,C	C,C	A,A	T,T	C,C	T,T	C,C	G,G	A,G	A,G
84	Guanxiangyou/Pengxiyou	UNASSIGNED	Chongqing, Guangzhou	Chongqing	8	T,T	T,C	T,T	T,C	A,A	T,T	G,G	C,C	T,T	T,C	A,A	G,T	T,T	C,C	T,C	C,C	C,C	A,A	T,T	C,C	G,T	C,C	A,G	A,G	A,A
85	Guokuiyou	UNASSIGNED	Chongqing	Sichuan	7	T,C	C,C	T,T	T,T	A,G	T,C	A,G	C,C	T,T	C,C	A,G	G,T	T,T	C,C	C,C	T,T	C,C	A,A	T,T	C,C	T,T	T,C	G,G	G,G	A,A
86	Hangwanmiyou	UNASSIGNED	Chongqing	Thailand	9	T,T	T,C	T,T	T,C	A,G	C,C	A,A	C,C	T,T	C,C	A,A	T,T	T,T	C,C	T,C	T,C	C,C	C,A	T,T	C,C	T,T	C,C	A,G	A,G	A,G
87	Haopuyou/Unknown_2003-24	UNASSIGNED	Chongqing, Guangzhou	-	7	C,C	T,C	T,A	T,C	A,A	C,C	A,A	C,C	T,C	T,C	A,A	G,T	T,T	C,C	T,T	C,C	C,C	A,A	T,T	C,C	T,T	C,C	A,G	A,G	A,A
88	Huayinshanxiangyou2	UNASSIGNED	Chongqing, Guangzhou	Sichuan	7	T,C	C,C	T,A	T,T	A,A	T,C	A,A	C,C	T,T	T,C	A,A	G,T	T,T	C,C	T,T	T,C	C,C	A,A	T,C	C,C	G,T	C,C	G,G	G,G	A,A
89	Humiyou	UNASSIGNED	Chongqing	Chongqing	9	C,C	C,C	A,A	T,C	G,G	T,C	A,G	C,C	T,T	T,T	A,A	G,T	G,T	C,C	T,C	C,C	T,C	A,A	T,T	C,C	G,T	C,C	G,G	G,G	A,G
90	Jiandingliangpingyou	UNASSIGNED	Chongqing	Chongqing	9	T,C	C,C	T,T	T,T	G,G	T,C	A,G	C,C	T,T	T,T	A,A	G,T	G,T	T,C	T,C	T,T	C,C	A,A	T,T	C,C	G,G	C,C	G,G	A,G	A,G
91	Jiangbeiwuheyou/Jintangwuheyou/Jintanglvyou	UNASSIGNED	Chongqing, Guangzhou	Sichuan	4	T,T	C,C	T,T	T,T	A,A	C,C	A,G	T,T	T,T	C,C	A,A	G,G	T,T	C,C	T,C	C,C	T,C	A,A	T,T	C,C	T,T	C,C	G,G	A,G	A,A
92	Jiangjinhongxinyou	UNASSIGNED	Chongqing	Chongqing	6	C,C	C,C	T,A	T,C	A,A	T,C	A,A	C,C	T,T	T,C	A,A	G,T	T,T	C,C	T,T	T,C	C,C	A,A	C,C	C,C	T,T	C,C	G,G	A,G	A,A
93	Jiangxizaoyou	UNASSIGNED	Chongqing	Jiangxi	8	T,C	C,C	T,T	T,C	A,G	T,C	A,A	T,T	T,T	T,C	A,A	T,T	T,T	C,C	T,T	T,C	C,C	C,A	T,T	C,C	T,T	C,C	G,G	A,A	A,G
94	Jiaodaoyou	UNASSIGNED	Chongqing	Japan	6	T,T	C,C	T,T	C,C	A,G	C,C	A,A	C,C	T,T	T,C	A,G	G,G	T,T	C,C	T,T	T,C	C,C	A,A	T,C	C,C	G,G	C,C	G,G	A,G	G,G
95	Jinlanyou2	UNASSIGNED	Chongqing, Guangzhou	Jiangxi	8	T,T	C,C	T,T	T,T	A,G	T,C	A,A	C,C	T,T	T,C	A,A	G,T	T,T	C,C	T,T	T,C	C,C	A,A	T,C	C,C	T,T	C,C	G,G	A,G	A,G
96	Jinshayou/Baiyushuang	UNASSIGNED	Chongqing	Hunan	3	T,C	C,C	T,A	T,T	A,A	C,C	A,A	T,T	T,T	T,T	A,A	G,G	G,T	C,C	T,C	T,T	C,C	A,A	T,T	C,C	T,T	C,C	G,G	G,G	A,A
97	Jinxiangyou3	UNASSIGNED	Guangzhou	Hunan	6	T,C	C,C	T,A	T,T	G,G	C,C	G,G	T,T	T,T	C,C	A,G	T,T	G,T	C,C	T,T	C,C	C,C	A,A	T,T	C,C	G,T	T,C	G,G	A,G	A,A
98	Juanpi2	UNASSIGNED	Chongqing	Japan	7	T,C	C,C	T,T	C,C	A,G	C,C	A,A	C,C	T,T	T,T	A,G	G,G	T,T	C,C	C,C	T,C	C,C	A,A	T,T	C,A	G,T	C,C	A,G	G,G	A,A
99	Kuiyou2	UNASSIGNED	Chongqing	Chongqing	7	T,C	T,C	T,A	C,C	A,A	C,C	A,A	T,T	C,C	T,C	A,A	G,T	T,T	C,C	T,T	T,T	T,T	A,A	T,T	C,C	T,T	C,C	A,G	A,G	A,G
100	Liangpinglocalpummelo	UNASSIGNED	Chongqing	Chongqing	7	T,C	C,C	T,A	T,T	A,G	C,C	A,A	C,C	T,T	C,C	A,A	G,G	T,T	C,C	T,C	C,C	T,C	A,A	T,C	C,C	G,T	C,C	G,G	A,G	A,A
101	Liangshayou	UNASSIGNED	Chongqing	Chongqing	7	T,T	C,C	T,T	T,T	G,G	C,C	A,A	C,C	T,T	T,C	A,A	G,T	G,T	C,C	T,C	T,C	C,C	C,C	T,T	C,C	G,G	C,C	G,G	A,G	A,G
102	Manguwendan	UNASSIGNED	Chongqing	Thailand	7	T,C	C,C	T,A	T,C	A,G	C,C	A,A	C,C	T,T	C,C	A,A	T,T	T,T	C,C	T,T	T,C	T,C	A,A	T,T	C,C	T,T	C,C	A,G	A,G	A,A
103	Meiwanyou	UNASSIGNED	Chongqing	Sichuan	6	T,C	T,T	T,T	C,C	A,A	C,C	A,A	C,C	T,T	T,T	A,A	G,G	G,T	C,C	T,C	T,C	C,C	C,A	T,T	C,C	T,T	C,C	G,G	G,G	A,G
104	Menglunzao/Dapaoguo/Unknown_02-02	UNASSIGNED	Chongqing, Guangzhou	Yunnan	6	C,C	C,C	T,T	C,C	A,G	C,C	A,A	C,C	T,C	C,C	A,A	G,G	T,T	C,C	T,T	T,C	C,C	A,A	T,T	C,C	T,T	C,C	A,G	A,G	A,G
105	Mianxuyou	UNASSIGNED	Chongqing	Hunan	6	T,T	C,C	T,T	T,C	A,G	T,T	A,G	T,T	T,T	T,T	A,A	G,G	T,T	C,C	T,T	T,C	C,C	A,A	T,T	C,C	G,G	C,C	A,G	A,G	A,A
106	Nangneiyou	UNASSIGNED	Chongqing	Vietnam	7	T,C	T,C	T,T	T,C	A,G	C,C	A,A	T,T	T,T	T,C	A,A	G,T	T,T	C,C	T,T	C,C	T,T	A,A	T,T	C,A	G,G	C,C	G,G	G,G	G,G
107	Peijiangyou	UNASSIGNED	Chongqing	-	12	T,T	T,C	T,T	C,C	A,G	T,C	A,G	T,T	T,C	T,C	G,G	G,T	G,T	C,C	C,C	T,C	T,C	C,A	T,T	C,A	G,G	C,C	A,A	G,G	A,A
108	Pingyanglayou	UNASSIGNED	Chongqing	Zhejiang	6	T,T	C,C	T,T	T,T	A,A	T,C	A,G	C,C	C,C	C,C	A,A	G,T	T,T	C,C	T,T	T,C	T,C	A,A	T,T	C,C	G,T	C,C	G,G	G,G	A,A
109	Qiyou2	UNASSIGNED	Chongqing, Guangzhou	Sichuan	7	T,C	T,T	T,T	T,C	A,G	C,C	A,A	T,C	T,T	C,C	A,A	G,T	T,T	C,C	C,C	C,C	C,C	C,A	T,T	C,C	T,T	C,C	A,G	G,G	A,A
110	Raopingyou	UNASSIGNED	Chongqing	Guangdong	10	T,C	C,C	T,A	T,T	A,G	C,C	A,A	T,T	T,C	T,C	A,G	G,T	G,T	C,C	T,C	T,C	C,C	A,A	T,T	C,C	T,T	T,T	G,G	G,G	A,G
111	Sanbaoyou	UNASSIGNED	Chongqing	-	5	T,C	C,C	T,T	C,C	A,G	C,C	A,A	C,C	T,T	T,T	A,G	G,G	T,T	C,C	C,C	T,C	C,C	A,A	T,T	C,C	G,G	C,C	A,G	G,G	A,A
112	Shatianyou×Dianjiangyou	UNASSIGNED	Chongqing	-	6	T,C	C,C	T,A	T,T	A,G	T,C	A,A	C,C	T,T	C,C	A,A	T,T	G,T	C,C	T,T	C,C	C,C	A,A	T,C	C,C	T,T	C,C	A,G	G,G	A,A
113	Shuhuayou	UNASSIGNED	Chongqing	Sichuan	7	T,T	C,C	T,A	T,C	A,G	C,C	A,A	C,C	T,T	T,C	A,A	T,T	G,T	C,C	T,T	T,C	C,C	A,C	T,T	C,C	G,G	C,C	A,G	A,G	A,A
114	Taiguomiyou	UNASSIGNED	Chongqing	Thailand	8	T,T	T,C	A,A	T,C	A,A	C,C	A,G	C,C	T,T	T,C	A,A	T,T	T,T	C,C	T,T	T,T	T,C	A,A	T,T	C,C	T,T	C,C	A,G	A,G	A,G
115	Wanbaiyou×Jinxiangyou	UNASSIGNED	Chongqing	-	5	T,T	C,C	T,A	T,T	G,G	C,C	A,A	T,T	T,T	T,C	A,A	G,T	T,T	C,C	T,T	C,C	C,C	A,A	T,C	C,C	G,T	T,C	G,G	A,A	A,A
116	Xianluodisuanyou	UNASSIGNED	Chongqing	Thailand	5	T,T	C,C	T,T	T,T	A,A	C,C	A,A	T,C	T,T	T,C	A,A	G,T	T,T	C,C	T,T	C,C	C,C	A,A	T,T	C,C	G,T	C,C	G,G	A,G	A,A
117	Xianluomiyou3	UNASSIGNED	Chongqing, Guangzhou	Thailand	7	T,C	C,C	T,T	T,C	A,G	C,C	G,G	C,C	T,T	C,C	A,G	G,G	T,T	C,C	T,C	C,C	C,C	A,A	T,T	C,A	G,T	C,C	G,G	G,G	A,A
118	Xianluoyou×Shatianyou2	UNASSIGNED	Chongqing, Guangzhou	-	8	T,T	T,C	T,A	T,C	A,G	T,C	A,G	C,C	T,T	T,T	A,A	T,T	T,T	C,C	T,C	C,C	T,C	A,A	T,T	C,C	T,T	C,C	G,G	A,A	A,G
119	Xiashalongyou	UNASSIGNED	Chongqing	Sichuan	4	T,T	C,C	T,T	T,T	A,A	C,C	A,A	T,C	T,T	T,T	A,A	G,G	G,T	C,C	T,C	T,T	C,C	A,A	T,T	C,C	G,T	C,C	G,G	G,G	A,A
120	Yianwoyou	UNASSIGNED	Guangzhou	Vietnam	9	T,C	T,C	T,A	T,C	A,G	T,T	A,G	T,T	T,C	T,T	A,A	G,T	T,T	C,C	T,T	C,C	C,C	A,A	T,T	C,C	T,T	C,C	A,G	A,G	A,A
121	Yuenanxiaoyou2	UNASSIGNED	Chongqing, Guangzhou	Vietnam	5	T,T	C,C	T,T	T,T	A,A	C,C	A,A	C,C	T,T	T,T	A,A	G,G	G,T	C,C	T,C	T,C	C,C	C,A	T,T	C,C	G,T	C,C	G,G	G,G	A,A
122	Zaoshuxianluoyou	UNASSIGNED	Chongqing	Thailand	5	C,C	C,C	T,T	T,T	A,A	C,C	A,A	C,C	T,C	C,C	A,A	G,T	T,T	C,C	T,T	T,C	C,C	A,A	T,T	C,C	T,T	C,C	G,G	A,G	A,G
123	Zaoshuyou	UNASSIGNED	Guangzhou	-	10	T,C	T,C	T,T	T,C	A,G	C,C	A,A	C,C	T,C	C,C	A,A	T,T	G,T	C,C	T,T	T,T	C,C	C,A	T,T	C,C	T,T	C,C	A,G	A,G	A,G
124	Zuoshiyou	UNASSIGNED	Chongqing	Chongqing	7	C,C	C,C	T,A	T,C	A,A	C,C	A,G	C,C	T,C	T,C	A,A	T,T	T,T	C,C	T,T	T,C	C,C	A,A	T,T	C,C	T,T	C,C	G,G	A,G	A,G
125	Anjiangxiangyou/Anjiangcheng	WENDAN	Chongqing	Hunan	4	T,T	C,C	T,A	T,T	A,A	C,C	A,A	T,T	T,T	T,T	A,A	G,T	G,T	C,C	T,T	C,C	C,C	A,A	T,C	C,C	G,G	C,C	G,G	A,A	A,G
126	Beibeiyou/Duanshiyou	WENDAN	Chongqing, Guangzhou	Chongqing	9	T,C	T,C	T,T	T,C	A,G	C,C	A,A	T,C	T,T	C,C	A,A	G,T	T,T	C,C	T,C	T,C	C,C	C,C	T,T	C,C	T,T	T,C	G,G	G,G	A,A
127	Bingtangyou2	WENDAN	Chongqing, Guangzhou	Sichuan	5	T,C	C,C	T,A	T,T	A,G	C,C	A,A	T,T	T,T	T,T	A,A	G,G	T,T	C,C	T,C	T,C	C,C	A,A	T,T	C,A	T,T	C,C	A,A	G,G	A,A
128	Cuipitianyou	WENDAN	Chongqing	Sichuan	8	T,T	T,C	T,T	T,T	A,A	C,C	A,G	C,C	T,T	C,C	A,A	G,G	G,T	T,C	T,C	T,C	T,C	C,C	T,T	C,C	G,G	C,C	G,G	A,G	A,A
129	Dayongjuhuaxin/Unknown23-13/Unknown22-13	WENDAN	Chongqing	Hunan	4	T,T	C,C	T,A	T,T	A,A	C,C	A,A	C,C	T,T	T,C	A,A	G,G	G,T	C,C	T,T	T,C	C,C	A,A	T,C	C,C	T,T	C,C	G,G	G,G	A,A
130	Dianjiangzhoujiabaixinyou/Dianjianghuangshabaixinyou/Dianjiangzengjiabaixinyou	WENDAN	Chongqing, Guangzhou	Chongqing	5	T,C	C,C	T,T	T,T	G,G	C,C	A,A	T,T	T,T	C,C	A,A	T,T	G,T	C,C	T,T	C,C	C,C	A,A	T,T	C,C	G,T	T,C	G,G	A,G	A,A
131	Fenghuangyou	WENDAN	Chongqing	Sichuan	4	T,C	C,C	T,T	T,T	G,G	C,C	A,A	C,C	T,T	T,T	A,A	G,T	T,T	C,C	C,C	T,C	C,C	C,A	T,T	C,C	G,G	C,C	G,G	G,G	A,A
132	Fujianwendan3/Unknown_39-16	WENDAN	Chongqing	Fujian	10	T,C	C,C	T,T	T,T	G,G	T,C	A,G	C,C	T,C	T,T	A,A	G,T	G,T	T,C	C,C	T,T	T,C	C,A	T,T	C,C	G,G	C,C	A,G	A,A	A,A
133	Fuyuanhongxinyou2	WENDAN	Chongqing, Guangzhou	Sichuan	4	T,T	C,C	T,T	T,T	A,A	C,C	A,A	C,C	T,T	T,T	A,G	G,G	G,T	C,C	T,C	T,C	C,C	A,A	T,T	C,C	G,G	C,C	G,G	G,G	A,A
134	Liangpingyou2_cq	WENDAN	Chongqing	Chongqing	5	T,T	C,C	A,A	T,T	A,G	C,C	A,A	T,C	T,T	T,T	A,A	G,G	T,T	C,C	C,C	T,C	C,C	A,A	T,T	C,C	G,G	C,C	G,G	A,G	A,G
135	Liangpingyou2_gz/Burmese_pummelo	WENDAN	Guangzhou, Chongqing	Chongqing	4	T,T	C,C	T,T	T,T	A,G	C,C	A,A	C,C	T,T	T,T	A,A	G,G	T,T	C,C	C,C	T,C	C,C	C,C	T,T	C,C	G,G	C,C	G,G	A,G	A,G
136	Longanyou2_cq	WENDAN	Chongqing	Sichuan	6	T,C	C,C	A,A	C,C	A,A	C,C	A,A	T,T	T,T	C,C	A,A	G,T	T,T	C,C	T,T	T,T	T,T	A,A	T,C	C,C	G,T	C,C	A,G	A,A	A,G
137	Longanyou2_gz	WENDAN	Guangzhou	Sichuan	5	T,C	T,C	T,T	T,C	A,A	C,C	A,A	C,C	T,T	C,C	A,A	G,G	T,T	C,C	T,T	C,C	C,C	A,A	T,T	C,C	G,G	C,C	A,A	A,G	A,G
138	Pengxianzhangzhouyou	WENDAN	Chongqing	Sichuan	9	T,T	T,C	T,A	T,T	A,A	T,C	G,G	C,C	T,T	C,C	A,A	T,T	G,T	C,C	T,T	T,C	T,C	A,A	T,C	C,C	T,T	C,C	A,G	A,G	A,G
139	Pingshanyou2_cq	WENDAN	Chongqing	Fujian	8	T,T	C,C	T,T	T,T	A,A	C,C	A,G	C,C	T,T	T,T	A,A	G,T	G,T	T,C	T,C	C,C	C,C	A,A	T,T	C,C	T,T	T,C	A,G	A,A	A,G
140	Pingshanyou2_gz	WENDAN	Guangzhou	Fujian	13	T,C	C,C	T,T	T,C	A,G	C,C	A,G	C,C	T,T	T,C	A,A	G,G	G,T	T,C	T,C	T,T	T,C	A,A	T,T	C,C	G,T	C,C	A,G	A,G	A,G
141	Redfleshguanximiyou2/Guanximiyou3/Sanhongyou/Huangjinyou	WENDAN	Chongqing, Guangzhou, Meizhou	Fujian	6	T,C	C,C	T,T	T,T	A,A	C,C	A,G	T,C	T,T	C,C	A,A	G,G	G,T	T,C	C,C	T,T	T,C	C,C	T,T	C,C	G,G	C,C	G,G	G,G	A,A
142	Shuijingwendan	WENDAN	Chongqing	Malaysia	8	T,T	T,C	T,T	T,C	A,A	T,C	G,G	C,C	T,T	T,C	A,G	G,T	T,T	C,C	T,T	C,C	C,C	A,A	T,T	C,C	T,T	C,C	G,G	A,G	A,G
143	Sijipao	WENDAN	Chongqing	Zhejiang	8	T,T	C,C	T,A	T,T	G,G	C,C	A,G	C,C	T,T	T,C	A,A	G,G	T,T	C,C	T,C	T,T	C,C	A,A	T,C	C,C	G,T	T,C	G,G	A,G	A,G
144	Tongxianyou3/Unknown_8-9	WENDAN	Chongqing, Guangzhou	Sichuan	9	T,C	C,C	T,T	T,T	G,G	T,C	A,G	C,C	T,C	T,T	A,A	G,G	G,G	T,T	C,C	T,C	T,C	C,C	T,T	C,C	G,T	C,C	G,G	A,G	A,G
145	Wanbaiyou2	WENDAN	Chongqing, Guangzhou	Malaysia	7	T,T	T,C	T,A	T,T	A,G	C,C	A,A	T,T	T,T	T,C	A,G	G,G	T,T	C,C	T,C	C,C	C,C	A,A	T,C	C,C	T,T	C,C	G,G	A,A	A,G
146	Wendan	WENDAN	Chongqing	-	10	T,C	C,C	T,T	T,T	A,A	C,C	A,A	T,C	T,C	T,T	A,A	G,T	G,T	T,C	C,C	T,C	C,C	C,A	T,T	C,C	G,T	C,C	G,G	A,G	A,A
147	Wubuhongxinyou2_cq	WENDAN	Chongqing	Sichuan	11	T,C	T,C	T,T	T,T	A,A	T,C	A,G	C,C	T,T	T,C	A,A	G,G	T,T	C,C	T,T	T,C	C,C	C,A	T,T	C,C	G,T	T,C	A,G	A,G	A,A
148	Wubuhongxinyou2_gz	WENDAN	Guangzhou	Sichuan	8	T,T	C,C	T,T	T,C	A,G	T,T	A,A	C,C	T,T	T,T	A,A	G,T	G,T	C,C	T,T	T,T	C,C	C,C	T,T	C,C	G,T	T,C	G,G	A,G	A,G
149	Yongjiazaoxiangyou2/Unknown_28-11	WENDAN	Chongqing, Guangzhou	Zhejiang	7	T,T	C,C	T,T	C,C	A,G	T,C	A,A	T,C	T,T	T,C	A,A	G,T	G,G	C,C	T,T	C,C	C,C	A,A	T,T	C,C	T,T	C,C	G,G	A,G	A,G
150	Dongguaquan3	SHATIANYOU	Chongqing	Chongqing	5	T,T	T,C	T,A	T,T	G,G	C,C	A,A	C,C	T,T	T,C	A,A	T,T	G,T	C,C	T,C	C,C	C,C	A,C	T,T	C,C	G,T	C,C	G,G	A,A	A,A
151	Gulaoqian2/Lingnanshatianyou3/Hejiangyou2/Zhenlongyou2	SHATIANYOU	Chongqing, Guangzhou	Chongqing, Guangxi	7	T,T	T,C	T,T	T,T	G,G	C,C	A,A	C,C	T,T	T,C	A,A	T,T	G,T	C,C	T,C	T,C	C,C	A,C	T,T	C,C	G,T	C,C	G,G	A,G	A,A
152	Meiweishatianyou2	SHATIANYOU	Chongqing	Guangxi	3	T,T	C,C	T,T	T,T	G,G	C,C	A,A	C,C	T,T	C,C	A,A	T,T	G,T	C,C	T,T	C,C	C,C	A,C	T,T	C,C	G,G	C,C	A,G	A,G	A,A
153	Shatianyou-1/Unknown_18-12/Unknown_18-13	SHATIANYOU	Chongqing	Guangxi	4	T,T	C,C	T,T	T,T	G,G	C,C	A,A	C,C	T,T	C,C	A,A	T,T	G,T	C,C	T,T	C,C	C,C	A,A	T,T	C,C	G,T	C,C	A,G	A,G	A,A
154	Taijitu3	SHATIANYOU	Chongqing, Guangzhou	Sichuan	5	T,T	C,C	T,A	T,C	G,G	C,C	A,A	C,C	T,C	T,T	A,A	T,T	T,T	C,C	T,T	C,C	C,C	A,A	T,C	C,C	G,G	C,C	A,G	G,G	A,G
155	Zaoshuhongxinshatianyou/Hongxinshatianyou	SHATIANYOU	Chongqing	Guangxi	3	T,T	C,C	T,A	T,C	G,G	C,C	A,A	C,C	T,T	T,C	A,A	T,T	G,G	C,C	T,T	C,C	C,C	A,A	T,T	C,C	T,G	C,C	A,G	G,G	A,A
156	Zhaipoyou	SHATIANYOU	Chongqing	Jiangxi	9	T,T	T,C	T,T	T,T	A,G	C,C	A,A	T,C	T,T	T,C	A,A	G,T	G,T	C,C	T,C	T,T	T,C	C,A	T,T	C,C	G,G	C,C	G,G	G,G	A,A
157	Chandler2	HYBRID	Chongqing	California	7	T,C	T,C	T,T	T,T	A,A	C,C	A,G	T,T	T,T	T,T	A,A	G,T	T,T	C,C	T,T	T,C	C,C	A,A	T,C	C,C	G,T	C,C	G,G	G,G	A,A
158	Boluoxiangyou	HYBRID	Chongqing	-	5	T,C	C,C	T,T	T,T	A,G	C,C	A,A	C,C	T,T	C,C	A,G	G,G	T,T	C,C	T,C	C,C	C,C	A,A	T,T	C,C	G,G	C,C	A,G	G,G	A,A
159	Kawano Natsudaidai/Beni Amanatsu	HYBRID	Chongqing	Japan	7	T,T	C,C	T,T	C,C	A,G	C,C	A,A	C,C	T,T	T,T	A,G	G,G	T,T	C,C	T,C	C,C	C,C	A,A	T,C	C,C	G,T	C,C	A,G	A,G	A,A
160	Cocotail grapefruit2	HYBRID	Chongqing, Guangzhou	California	8	T,T	C,C	T,T	T,C	A,G	C,C	A,A	T,T	T,T	T,C	A,G	G,G	T,T	C,C	T,C	C,C	C,C	A,A	T,T	C,A	G,G	C,C	A,G	A,G	A,A
161	Hassaku/Red hassaku	HYBRID	Chongqing, Guangzhou	Japan	12	T,T	C,C	T,T	T,C	A,G	C,C	A,G	T,C	T,T	T,T	A,G	G,T	T,T	C,C	T,C	C,C	C,C	A,A	T,C	C,A	G,T	T,C	A,G	G,G	G,G
162	Huazhoujuhong-13	HYBRID	Guangzhou	Huazhou	5	T,T	C,C	A,A	C,C	A,A	T,C	A,G	C,C	T,T	C,C	A,G	G,G	T,T	C,C	T,T	T,C	C,C	C,A	T,T	C,C	G,G	T,T	G,G	G,G	A,A
163	Huazhoujuhong-23	HYBRID	Chongqing	Huazhou	5	T,T	C,C	T,T	T,T	A,A	C,C	A,G	C,C	T,T	C,C	A,G	G,G	T,T	C,C	T,T	C,C	T,C	C,A	T,T	C,C	G,G	C,C	A,G	G,G	A,A
164	Huyou2	HYBRID	Chongqing, Guangzhou	Zhejiang	7	T,T	C,C	T,T	T,T	A,G	T,C	A,A	C,C	T,T	T,T	A,G	T,T	T,T	C,C	T,C	C,C	C,C	A,A	T,T	C,A	G,G	T,C	A,G	G,G	A,A
165	Iwaikan	HYBRID	Chongqing	Japan	14	T,T	T,C	T,T	C,C	A,G	C,C	A,A	T,C	T,T	T,T	A,G	G,T	G,T	T,C	C,C	T,C	T,C	C,A	T,C	C,A	G,T	C,C	A,A	A,G	A,A
166	Jianyangjuyou	HYBRID	Chongqing	Fujian	7	T,T	C,C	A,A	C,C	A,G	C,C	A,A	T,C	T,T	T,T	A,G	G,G	T,T	C,C	T,C	C,C	C,C	A,A	T,C	C,A	G,G	C,C	A,A	A,A	A,G
167	Lime	HYBRID	Chongqing	-	10	T,C	T,C	T,A	T,C	A,G	C,C	A,A	T,T	T,T	T,C	A,A	G,T	T,T	C,C	T,T	T,C	C,C	A,A	T,T	C,C	G,T	C,C	G,G	A,G	A,G
168	Oroblanco	HYBRID	Chongqing	California	17	T,C	T,T	T,T	T,C	A,A	T,C	A,G	C,C	T,C	T,T	A,G	G,T	G,T	C,C	T,C	T,C	T,C	C,A	T,T	C,A	T,T	T,C	A,G	A,G	A,G
169	Qingjian×Chandler	HYBRID	Chongqing	-	7	T,C	C,C	T,T	T,T	A,A	C,C	A,A	C,C	T,T	T,C	A,A	G,G	T,T	C,C	T,C	C,C	T,C	A,A	T,C	C,A	T,T	C,C	G,G	A,A	A,G
170	Redflamegrapefruit3/Redblushgrapefruit3/Starrubygrapefruit2	HYBRID	Chongqing, Guangzhou	-	20	T,C	T,C	T,T	T,C	A,A	T,C	A,G	C,C	T,C	T,C	A,G	G,G	G,G	T,C	T,C	T,C	T,C	C,A	T,C	C,A	G,T	T,C	A,G	A,G	A,G
171	Shatianyou×sweet orange	HYBRID	Chongqing	-	3	T,T	C,C	T,A	C,C	A,G	C,C	A,A	C,C	T,T	T,T	A,G	G,G	T,T	C,C	T,C	C,C	C,C	A,A	T,T	A,A	G,G	C,C	A,A	G,G	A,A
172	Shijiemiyou3	HYBRID	Chongqing, Guanghzou	Thailand	10	T,T	C,C	T,T	C,C	A,G	C,C	A,A	C,C	T,T	T,T	A,G	G,T	T,T	C,C	T,C	T,C	C,C	A,A	T,C	C,A	G,T	C,C	A,G	A,G	A,A
173	Tangyouzi	HYBRID	Chongqing	-	9	T,C	C,C	T,A	C,C	A,G	C,C	A,A	C,C	T,T	T,C	A,G	G,G	G,T	C,C	T,C	C,C	C,C	A,A	T,T	C,A	G,G	C,C	G,G	A,G	A,G
174	Wanggan	HYBRID	Chongqing	-	1	T,T	C,C	T,T	C,C	G,G	C,C	A,A	C,C	T,T	T,T	A,G	G,G	T,T	C,C	C,C	C,C	C,C	A,A	T,T	A,A	G,G	C,C	A,A	G,G	A,A
175	Wenlinggaocheng	HYBRID	Chongqing	Zhejiang	7	T,T	C,C	T,T	C,C	G,G	C,C	A,A	C,C	T,T	T,C	A,G	G,G	G,T	C,C	T,C	T,C	C,C	A,A	T,T	C,A	G,G	C,C	A,G	G,G	A,A
176	Zhengmaohuazhoujuhong3	HYBRID	Guangzhou	Huazhou	7	T,T	T,T	T,A	T,T	A,G	C,C	A,G	C,C	T,T	T,T	A,A	T,T	G,T	C,C	T,T	T,C	T,C	C,A	T,T	C,C	T,T	C,C	A,A	G,G	A,G
177	Citrus hongheensis	OUTGROUP	Chongqing	Yunnan	2	C,C	C,C	T,T	C,C	G,G	T,T	A,A	C,C	T,T	T,T	A,G	G,G	T,T	C,C	T,C	C,C	C,C	A,A	T,T	C,C	T,T	C,C	G,G	G,G	A,A
178	Citrus hongheensis×unknown citrus	OUTGROUP	Chongqing	-	5	T,C	C,C	T,T	C,C	A,G	T,C	A,A	C,C	T,T	T,T	A,G	G,G	T,T	C,C	T,T	C,C	C,C	C,A	T,T	C,C	T,T	C,C	G,G	G,G	A,A
Note: Red and blue background indicate the UNKNOWN group and the CUL group, respectively. 2 and 3 in the genotype_name collumn indicated that 2 or 3 individuals were sampled for the cultivar, otherwise only one individual was sampled.
